# Supplementary material for: Clinical and Functional Assessment of Digenicity in Renal Phosphate Wasting
Source: MDPI journal article supplement (doi:10.3390/nu15092081), 2023-04-26
Supplement: s1 [file s1]

| ID    | Genes                | Variants (ACMG classification)              | Kidney phenotype          | Extrarenal phenotype    | Laboratory analysis                      | Ref. |
|-------|----------------------|---------------------------------------------|---------------------------|-------------------------|------------------------------------------|------|
| III-7 | <b>SLC34A3</b> (het) | <i>c.1561dupC, p.Leu521Profs*72</i> (LP)    | bilateral kidney stones   | short stature, rickets  | hypophosphatemia, hypercalciuria         | [15] |
|       | <b>SLC34A1</b> (het) | <i>c.1535G&gt;A, p.Arg512His</i> (VUS)      |                           |                         |                                          |      |
| III-6 | <b>SLC34A3</b> (het) | <i>c.1561dupC, p.Leu521Profs*72</i> (LP)    | bilateral kidney stones   | short stature, rickets  | hypophosphatemia                         | [15] |
|       | <b>SLC34A1</b> (het) | <i>c.1535G&gt;A, p.Arg512His</i> (VUS)      |                           |                         |                                          |      |
| II-5  | <b>SLC34A3</b> (het) | <i>c.1561dupC, p.Leu521Profs*72</i> (LP)    | no                        | rickets, short stature  | normal serum phosphate                   | [15] |
|       | <b>SLC34A1</b> (het) | <i>c.1535G&gt;A, p.Arg512His</i> (VUS)      |                           |                         |                                          |      |
| 2     | <b>SLC34A3</b> (het) | <i>c.496G&gt;A, p.Gly166Ser</i> (P)         | recurrent nephrolithiasis | no                      | hypophosphatemia, CKD G2                 | [16] |
|       | <b>SLC34A3</b> (het) | <i>c.1093+41_1094-15del, p.?</i> (LP)       |                           |                         |                                          |      |
|       | <b>SLC34A1</b> (het) | <i>c.272_292del, p.Val91_Ala97del</i> (VUS) |                           |                         |                                          |      |
| 4     | <b>SLC34A3</b> (het) | <i>c.496G&gt;A, p.Gly166Ser</i> (P)         | recurrent nephrolithiasis | short stature           | hypophosphatemia, hypercalciuria, CKD G1 | [16] |
|       | <b>SLC34A1</b> (het) | <i>c.1416+3G&gt;A, p.?</i> (VUS)            |                           |                         |                                          |      |
|       | <b>NHERF1</b> (het)  | <i>c.328C&gt;G, p.Leu110Val</i> (LP)        |                           |                         |                                          |      |
| 6     | <b>SLC34A3</b> (hom) | <i>c.575C&gt;T, p.Ser192Leu</i> (LP)        | recurrent nephrolithiasis | mineralization disorder | hypophosphatemia, CKD G2                 | [16] |
|       | <b>NHERF1</b> (het)  | <i>c.328C&gt;G, p.Leu110Val</i> (LP)        |                           |                         |                                          |      |
| 8     | <b>SLC34A3</b> (het) | <i>c.781A&gt;G, p.Ser261Gly</i> (LB)        | mild                      | no                      | hypophosphatemia                         | [16] |
|       | <b>SLC34A1</b> (het) | <i>c.644+5G&gt;A, p.?</i> (VUS)             |                           |                         |                                          |      |

**Supplementary Table S1:** Previous reported case series of patients carrying digenic or oligogenic variants in genes associated with kidney stone disease due to renal phosphate wasting including their genotype and kidney/extrarenal phenotype.

Abbreviations: *het* heterozygous; *hom* homozygous; *LB* likely benign; *VUS* variant of unknown significance; *LP* likely pathogenic; *P* pathogenic; *CKD* chronic kidney disease; *CKD stages (G)* according KDIGO classification); *Ref.* Reference.
